# Supplementary material
Source: MDPI journal article supplement (https://www.mdpi.com/2073-4395/13/2/607)
Supplement: s1 [file s1]

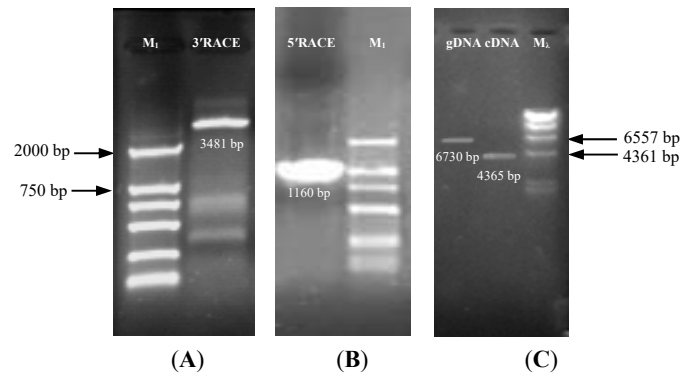

**Figure S1.** PCR amplicons of 3'RACE (A), 5'RACE (B), and in gDNA and cDNA (C) of *TaABCG36* from wheat TcLr19.  $M_1$ : DL2000 marker,  $M_\lambda$ :  $\lambda$ DNA/HindIII Marker.



**Table S1.** Off-target prediction of the three BSMV fragments by si-Fi software.

| Targets             | BSMV-V1          |                      | BSMV-V2          |                      | BSMV-V3          |                      |
|---------------------|------------------|----------------------|------------------|----------------------|------------------|----------------------|
|                     | Total siRNA Hits | Efficient siRNA Hits | Total siRNA Hits | Efficient siRNA Hits | Total siRNA Hits | Efficient siRNA Hits |
| TraesCS3D1G234400.1 | 149              | 72                   | 185              | 89                   | 177              | 82                   |
| TraesCS3B1G248400.1 | 146              | 72                   | 165              | 77                   | 156              | 70                   |
| TraesCS3A1G217900.1 | 59               | 29                   | 186              | 89                   | 99               | 49                   |

**Table S2.** Statistically analysis of the VIGS TcLr19 plants.

|         | Replication 1 |                 | Replication 2 |                 | Replication 3 |                 | Silenced Ratio (%) |
|---------|---------------|-----------------|---------------|-----------------|---------------|-----------------|--------------------|
|         | Total Plants  | Silenced Plants | Total Plants  | Silenced Plants | Total Plants  | Silenced Plants |                    |
| BSMV-V1 | 15            | 11              | 16            | 11              | 14            | 9               | 68.3 <sup>a†</sup> |
| BSMV-V2 | 18            | 12              | 17            | 13              | 18            | 11              | 69.3 <sup>a</sup>  |
| BSMV-V3 | 17            | 11              | 16            | 10              | 15            | 11              | 66.0 <sup>a</sup>  |

† Note: Different lowercase letters marked after the mean values identify significantly different means (Duncans' new multiple-range test ( $p < 0.05$ ,  $n = 3$ )).
